# Supplementary material for: The functionalization of natural polymer-coated gold nanoparticles to carry bFGF to promote tissue regeneration
Source: Royal Society of Chemistry journal article supplement (doi:10.1039/c7tb03273k), 2018-01-01
Supplement: c7tb03273k1.pdf [file c7tb03273k1.pdf]

## Electronic Supplementary Information

### Functionalization of natural polymers coated-gold nanoparticles with bFGF for regenerative purposes

Helena Ferreira,<sup>a,b†</sup> Albino Martins,<sup>a,b</sup> Marta L. Alves da Silva,<sup>a,b</sup> Sara Amorim,<sup>a,b</sup> Susana Faria,<sup>c</sup>  
Ricardo A. Pires,<sup>a,b</sup> Rui L. Reis,<sup>a,b</sup> Nuno M. Neves,<sup>a,b†</sup>

<sup>a</sup>3B's Research Group - Biomaterials, Biodegradables and Biomimetics, Department of Polymer Engineering, University of Minho; Headquarters of the European Institute of Excellence on Tissue Engineering and Regenerative Medicine; AvePark- Parque de Ciência e Tecnologia, Zona Industrial da Gandra, 4805-017 Barco GMR, Portugal.

<sup>b</sup>ICVS/3B's - PT Government Associate Laboratory, Braga/Guimarães, Portugal.

<sup>c</sup>Department of Mathematics for Science and Technology, Research CMAT, University of Minho, Campus de Azurém, 4800-058 Guimarães, Portugal.

<sup>†</sup>Corresponding authors: [nuno@dep.uminho.pt](mailto:nuno@dep.uminho.pt); [helenaferreira@dep.uminho.pt](mailto:helenaferreira@dep.uminho.pt)

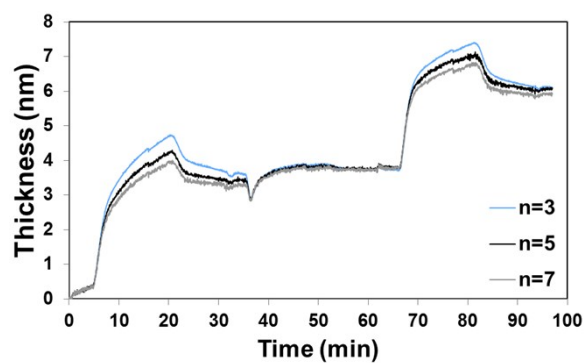

Fig. S1 Real time thickness estimation using the Sauerbrey model for the 3<sup>rd</sup>, 5<sup>th</sup> and 7<sup>th</sup> overtones.

Table S1 Amount of the anti-bFGF antibody linked to amino groups of chitosan from natural polymers-coated AuNPs, in the presence of increasing concentrations of them (measured in terms of Au atoms using ICP-OES).

| [Au]<br>( $\mu\text{g/mL}$ ) | Anti-bFGF<br>bound (ng) |
|------------------------------|-------------------------|
| 250                          | 121.6 $\pm$ 12.6        |
| 500                          | 140.2 $\pm$ 18.8        |
| 750                          | 156.6 $\pm$ 12.8        |
| 1000                         | 190.0 $\pm$ 31.4        |

Video S1 NPs moving (Brownian motion) acquired using the NanoSight NS500 instrument.
